# Supplementary material for: Expression of DNA Methyltransferase 3B Isoforms Is Associated with DNA Satellite 2 Hypomethylation and Clinical Prognosis in Advanced High-Grade Serous Ovarian Carcinoma
Source: MDPI journal article supplement (doi:10.3390/ijms232112759), 2022-10-22
Supplement: s1 [file s1]

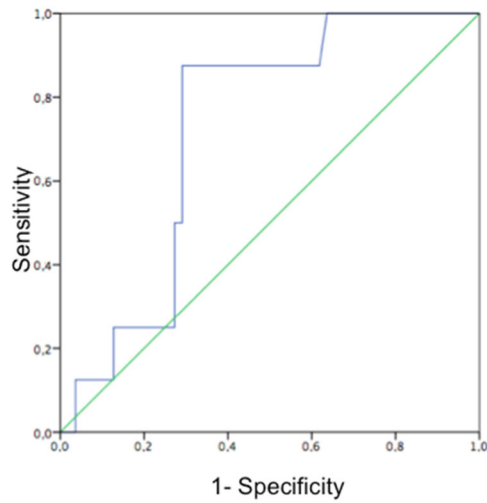

**Supplementary Figure S1.** DNMT3B3 is associated with poor prognostic in EOC. DNMT3B3 ROC curve of EOC deaths. The curve area was 0.705, with a cut value calculated by the ROC curve was 3.29 with 85% of sensitivity and 66% of specificity. 36% of patients in this study overexpress DNMT3B3 and could have poor clinical prognostic.
